# Supplementary material for: A cooperative effect of copper-induction and AIE leading to bright luminescence of gold nanoclusters
Source: Royal Society of Chemistry journal article supplement (doi:10.1039/d3qi01974h), 2023-11-13
Supplement: d3qi01974h1.pdf [file d3qi01974h1.pdf]

Supporting information for

**Cooperative Effect of Copper-Induction and AIE Leading to Bright  
Luminescence of Gold Nanoclusters**

Yongjie Zhang,<sup>a, ‡,\*</sup> Luyao Feng,<sup>b, ‡</sup> Jingyan Luan,<sup>b</sup> Guomei Zhang,<sup>a</sup> Ning Sheng,<sup>a</sup> Jinglin Shen<sup>b,\*</sup>

<sup>a</sup> School of Chemistry, Chemical Engineering and Materials, Jining University, Qufu, Shandong,  
273155, P. R. China

<sup>b</sup> School of Chemistry and Chemical Engineering, Qufu Normal University, Qufu, Shandong, 273165,  
P. R. China

\* Corresponding authors.

E-mail addresses: yj\_zhang\_chemeng@tju.edu.cn (Y. Zhang), jinglinshen@163.com (J. Shen)

‡ These authors contributed equally to this work.

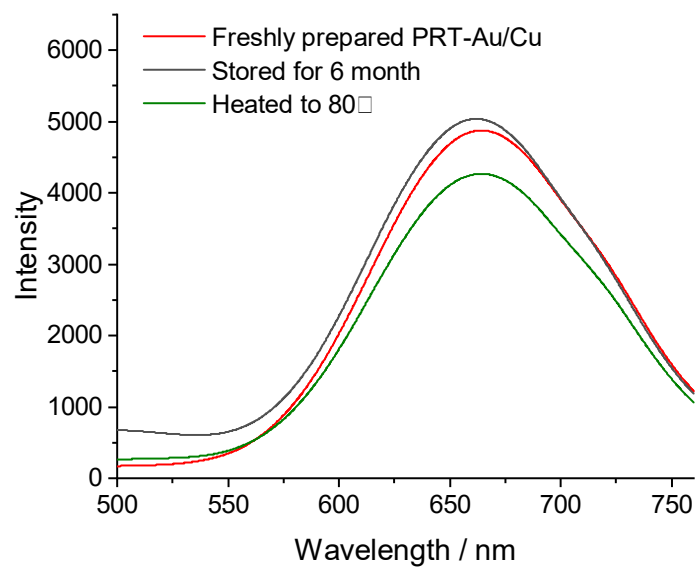

**Figure S1.** Photoluminescence spectra of **PRT-Au/Cu** composite to show its stability.

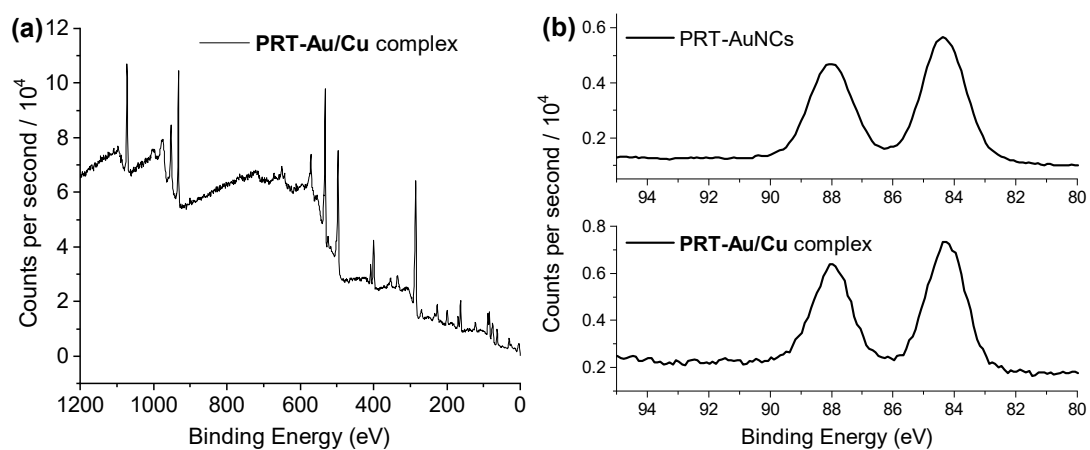

**Figure S2.** (a) Full spectrum of X-ray photoelectron spectroscopy (XPS) for **PRT-Au/Cu** complex  $c[\text{Cu}^{2+}] = 12$  mM; (b) Comparison of Au 4f spectra between PRT-AuNCs and **PRT-Au/Cu** complex.

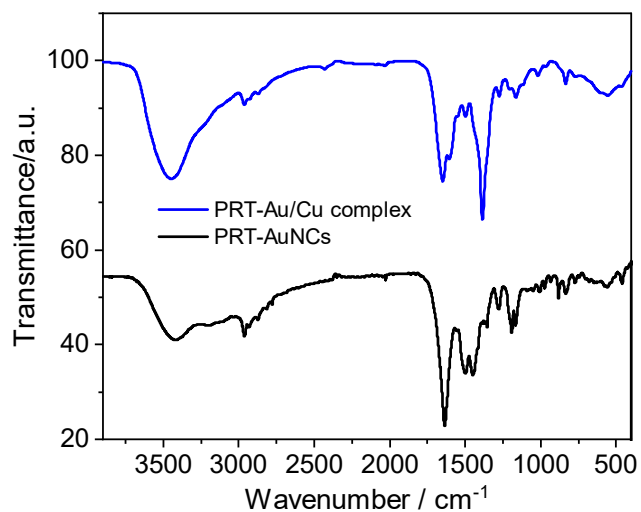

**Figure S3.** Comparison of FTIR spectra between **PRT-Au/Cu complex**  $c[\text{Cu}^{2+}] = 12 \text{ mM}$  and primitive PRT-AuNCs

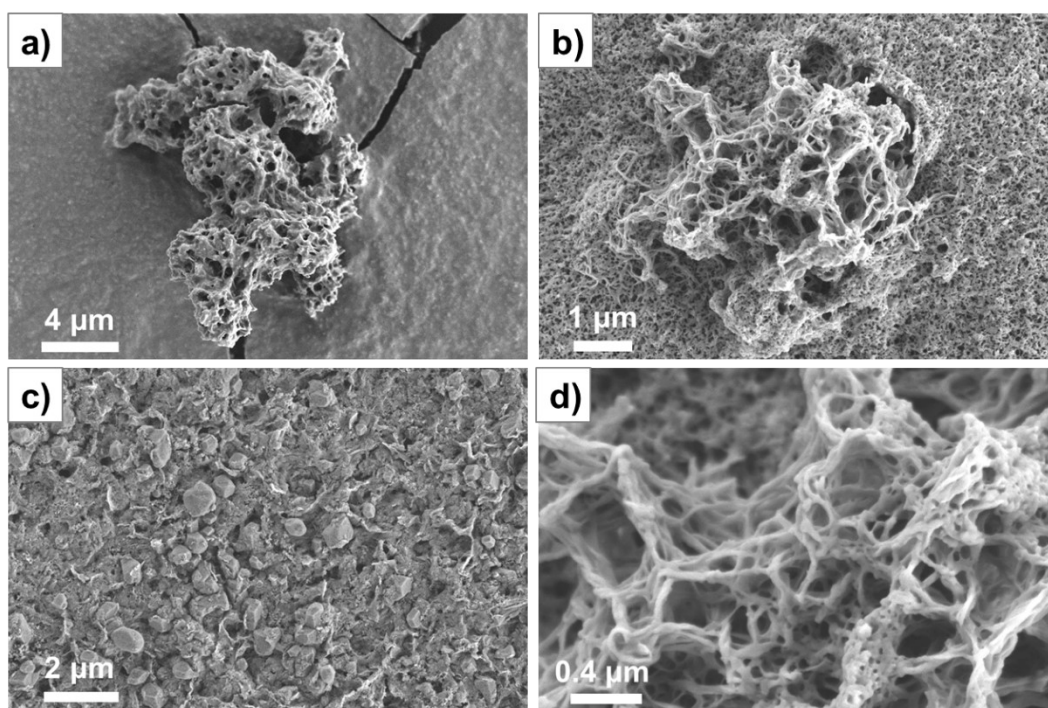

**Figure S4.** SEM images of PRT-AuNCs/ $\text{Cu}^{2+}$  systems with addition of (a) 10 mM; (b, d) 14 mM and (c) 16 mM  $\text{Cu}^{2+}$ .

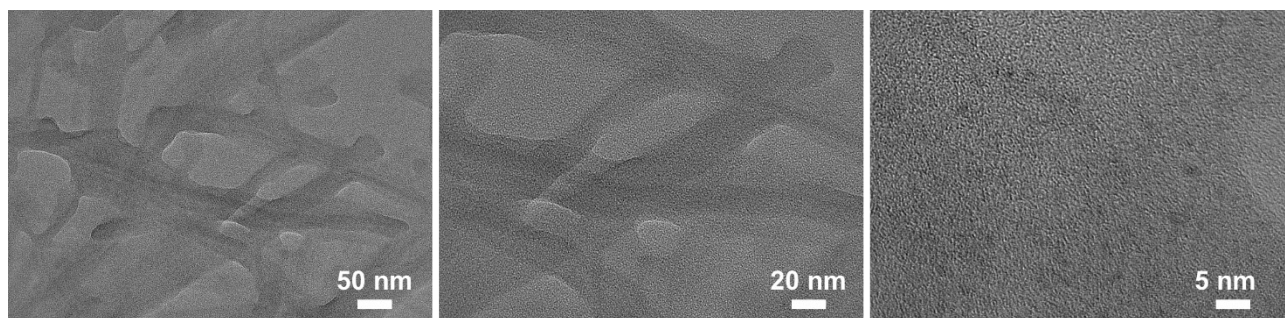

**Figure S5.** HR-TEM images of **PRT-Au/Cu** composite ( $c[\text{Cu}^{2+}] = 12 \text{ mM}$ ) at high magnification to show its detailed structure and components.

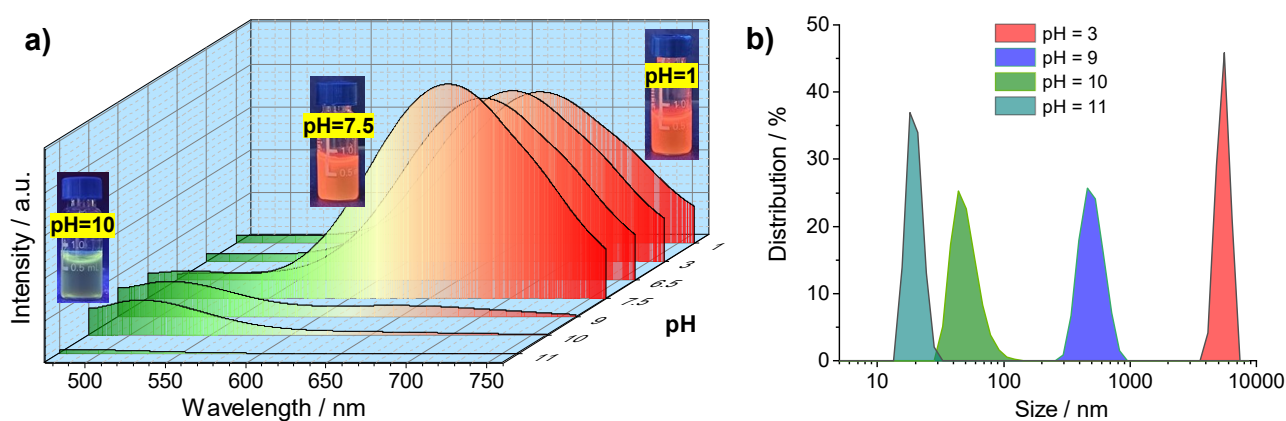

**Figure S6.** (a) pH-dependent photoluminescence spectra of **PRT-Au/Cu** composite (insets are the photos of samples at different pH under 365 nm UV lamp irradiation); (b) Size distribution of **PRT-Au/Cu** aggregates at different pH measured by dynamic light scattering.

**Table S1.** Photophysical parameters of **PRT-AuNCs** and **PRT-Au/Cu** composite in powder state

| Species                      | <sup>a</sup> $\lambda_{\text{Em}} / \text{nm}$ | <sup>b</sup> $\tau_1 / \mu\text{s}$ | <sup>b</sup> $\tau_2 / \mu\text{s}$ | <sup>c</sup> $\tau / \mu\text{s}$ |
|------------------------------|------------------------------------------------|-------------------------------------|-------------------------------------|-----------------------------------|
| PRT-AuNCs<br>(powder)        | 615                                            | 9.30<br>(0.9273)                    | 172.04<br>(0.0727)                  | 21.13                             |
| <b>PRT-Au/Cu</b><br>(powder) | 666                                            | 11.72<br>(0.8389)                   | 169.05<br>(0.1611)                  | 37.07                             |

<sup>a</sup> Maximum emission wavelength.

<sup>b</sup> Components of bi-exponential luminescence lifetimes and pre-exponential factors.

<sup>c</sup> Averaged luminescence lifetimes measured at excitation wavelength of  $\lambda_{\text{Ex}} = 365 \text{ nm}$ .

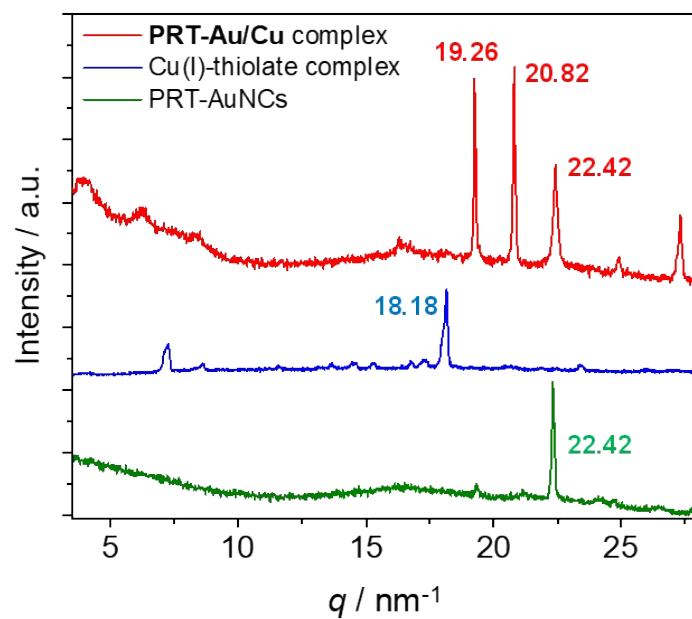

**Figure S7.** Small angle X-ray scattering patterns of PRT-AuNCs, Cu(I)-thiolate complex and PRT-Au/Cu composite.

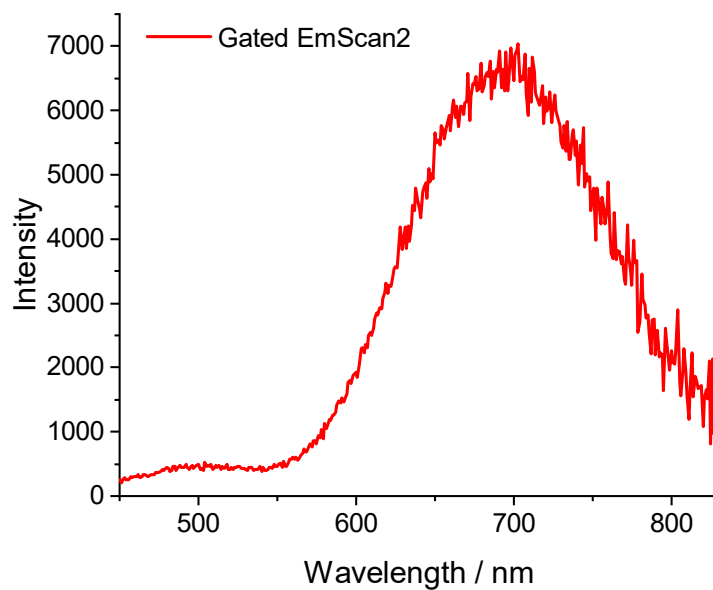

**Figure S8.** Phosphorescent spectra of PRT-Au/Cu composite ( $\lambda_{\text{Ex}} = 385 \text{ nm}$ , delay time: 5  $\mu\text{s}$ , gate width: 20  $\mu\text{s}$ ).

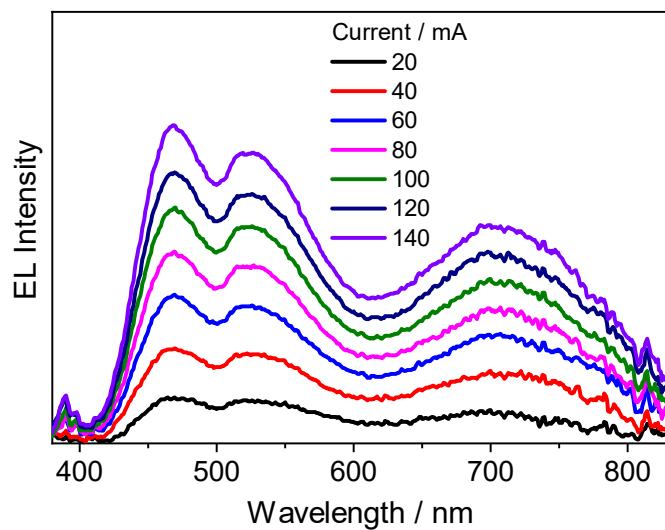

**Figure S9.** Electroluminescence spectra of the WLED prepared with **PRT-Au/Cu** composite and commercially available  $\text{BaMgAl}_{10}\text{O}_{17}:\text{Eu}^{2+}$  and  $(\text{Ba,Sr})_2\text{SiO}_4:\text{Eu}^{2+}$ .

**Table S2.** CIE coordinates and correlated color temperature (CCT) of the prepared WLED at different drive current.

| $I / \text{mA}$ | CIE $x$ | CIE $y$ | CCT / K |
|-----------------|---------|---------|---------|
| 20              | 0.2955  | 0.369   | 7001    |
| 40              | 0.2949  | 0.3684  | 7045    |
| 60              | 0.294   | 0.3613  | 7153    |
| 80              | 0.2925  | 0.3597  | 7245    |
| 100             | 0.2925  | 0.3589  | 7257    |
| 120             | 0.288   | 0.3613  | 7448    |
| 140             | 0.2884  | 0.3604  | 7433    |
